# Supplementary material
Source: PubMed Central journal article supplement (PMC1366643)
Supplement: biophysj_105.062513_1.pdf [file biophysj_105.062513_1.pdf]

## **Force and Flexibility of Flailing Myxobacteria**

Charles W. Wolgemuth

### **Supplemental Material**

**Movie 1:** Simulation of the flailing filament with  $FL^2/A = 250$  and  $\beta = 2.0$ .

**Movie 2:** Simulation of the flailing filament with  $FL^2/A = 500$  and  $\beta = 2.0$ .

**Movie 3:** Simulation of the flailing filament with  $FL^2/A = 250$  and  $\beta = 1.5$ .

**Movie 4:** Simulation of the flailing filament with  $FL^2/A = 250$  and  $\beta = 5.0$ .
